# Supplementary material for: Novel Mechanism-Based Descriptors for Extreme Ultraviolet-Induced Photoacid Generation: Key Factors Affecting Extreme Ultraviolet Sensitivity
Source: MDPI journal article supplement (doi:10.3390/molecules28176244), 2023-08-25
Supplement: s1 [file s1]

# Supporting Information

## Correlation between parameters and coefficients for regression model

Each table is coefficients obtained from the two-parameter regression model ( $\text{Dose} = \alpha \times \text{LUMO} - \beta \times P_{\text{after}} + \gamma$ ) using data set from reference XX, Set 1 (9 PAG molecules, PDQ-2, Expt. condition 1), Set 2 (9 PAG molecules, PDQ-3, Expt. condition 1), and Set 3 (8 PAG molecules, PDQ-2, Expt. condition 2). Because of the confidential reason, structures for set 1, 2, and 3 are not provided.

**Table S1.** Parameters for regression model and the coefficient of determination between experimental and theoretically predicted EUV dose value for structures in the reference 10. Correlation between LUMO and pKa(DPS), pKa(arranged),  $\Delta G_{\text{oxidation}}$ , and  $\Delta G_{\text{total}}$  are also shown to avoid multiple correlations between parameters.

| LUMO with                           | pKa(DPS) | pKa(arranged) | Oxidation Pot.<br>$\Delta G_{\text{oxidation}}$ | Total Oxidation E<br>$\Delta G_{\text{total}}$ |
|-------------------------------------|----------|---------------|-------------------------------------------------|------------------------------------------------|
| R <sup>2</sup> (Prediction)         | 0.85     | 0.95          | 0.99                                            | 0.518                                          |
| Max diff(Dose, mJ/cm <sup>2</sup> ) | 6.57     | 3.41          | 1.03                                            | 11.33                                          |
| Correlation with LUMO               | 0.81     | 0.56          | 0.26                                            | 0.42                                           |
| $\alpha$                            | -5.84    | 0.71          | -0.41                                           | -2.69                                          |
| $\beta$                             | 9.01     | -13.21        | 11.35                                           | 12.63                                          |
| $\gamma$                            | -22.87   | 5.19          | -33.02                                          | -37.63                                         |

**Table S2.** Parameters for regression model and the coefficient of determination between experimental and theoretically predicted EUV dose value for structures in set1. Correlation between LUMO and pKa(DPS), pKa(arranged),  $\Delta G_{\text{oxidation}}$ , and  $\Delta G_{\text{total}}$  are also shown to avoid multiple correlations between parameters.

| LUMO with                           | pKa(DPS) | pKa(arranged) | Oxidation Pot.<br>$\Delta G_{\text{oxidation}}$ | Total Oxidation E<br>$\Delta G_{\text{total}}$ |
|-------------------------------------|----------|---------------|-------------------------------------------------|------------------------------------------------|
| R <sup>2</sup> (Prediction)         | 0.70     | 0.77          | 0.73                                            | 0.66                                           |
| Max diff(Dose, mJ/cm <sup>2</sup> ) | 9.23     | 7.03          | 7.21                                            | -13.115                                        |
| Correlation with LUMO               | 0.39     | 0.63          | 0.71                                            | 0.38                                           |
| $\alpha$                            | 27.75    | 35.61         | 35.95                                           | 17.86                                          |
| $\beta$                             | -11.59   | -87.09        | 74.99                                           | -133.86                                        |
| $\gamma$                            | 166.77   | 115.96        | -105.95                                         | 528.78                                         |

**Table S3.** Parameters for regression model and the coefficient of determination between experimental and theoretically predicted EUV dose value for structures in set2. Correlation between LUMO and pKa(DPS), pKa(arranged),  $\Delta G_{\text{oxidation}}$ , and  $\Delta G_{\text{total}}$  are also shown to avoid multiple correlations between parameters.

| LUMO with                           | pKa(DPS) | pKa(arranged) | Oxidation Pot.<br>$\Delta G_{\text{oxidation}}$ | Total Oxidation E<br>$\Delta G_{\text{total}}$ |
|-------------------------------------|----------|---------------|-------------------------------------------------|------------------------------------------------|
| R <sup>2</sup> (Prediction)         | 0.14     | 0.07          | 0.09                                            | 0.67                                           |
| Max diff(Dose, mJ/cm <sup>2</sup> ) | 8.75     | 13.57         | 14.88                                           | 8.00                                           |
| Correlation with LUMO               | 0.28     | 0.05          | 0.19                                            | 0.55                                           |
| $\alpha$                            | 12.21    | 7.93          | 5.67                                            | -16.18                                         |
| $\beta$                             | -33.16   | -5.02         | -11.78                                          | -251.49                                        |
| $\gamma$                            | 161.07   | 96.61         | 137.71                                          | 788.71                                         |

**Table S4.** Parameters for regression model and the coefficient of determination between experimental and theoretically predicted EUV dose value for structures in the set3. Correlation between LUMO and pKa(DPS), pKa(arranged),  $\Delta G_{\text{oxidation}}$ , and  $\Delta G_{\text{total}}$  are also shown to avoid multiple correlations between parameters.

| LUMO with                           | pKa(DPS) | pKa(arranged) | Oxidation Pot.<br>$\Delta G_{\text{oxidation}}$ | Total Oxidation E<br>$\Delta G_{\text{total}}$ |
|-------------------------------------|----------|---------------|-------------------------------------------------|------------------------------------------------|
| R <sup>2</sup> (Prediction)         | 0.87     | 0.87          | 0.83                                            | 0.91                                           |
| Max diff(Dose, mJ/cm <sup>2</sup> ) | 6.01     | 4.99          | 7.07                                            | 5.15                                           |
| Correlation with LUMO               | 0.73     | 0.75          | 0.88                                            | 0.34                                           |
| $\alpha$                            | 15.16    | 33.15         | 29.83                                           | 18.56                                          |
| $\beta$                             | 25.04    | -70.18        | 37.36                                           | -194.58                                        |
| $\gamma$                            | 67.27    | 119.20        | 15.09                                           | 717.87                                         |

**Table S5.** Parameters for regression model and the coefficient of determination between experimental and theoretically predicted EUV dose value for structures in the validation set. Correlation between LUMO and pKa(DPS), pKa(arranged),  $\Delta G_{\text{oxidation}}$ , and  $\Delta G_{\text{total}}$  are also shown to avoid multiple correlations between parameters.

| LUMO with                           | pKa(DPS) | pKa(arranged) | Oxidation Pot.<br>$\Delta G_{\text{oxidation}}$ | Total Oxidation E<br>$\Delta G_{\text{total}}$ |
|-------------------------------------|----------|---------------|-------------------------------------------------|------------------------------------------------|
| R <sup>2</sup> (Prediction)         |          | 0.08          | 0.14                                            | 0.93                                           |
| Max diff(Dose, mJ/cm <sup>2</sup> ) |          | 42.74         | 37.35                                           | 7.15                                           |
| Correlation with LUMO               |          | 0.33          | 0.35                                            | 0.05                                           |
| $\alpha$                            | 15.16    | 33.15         | 29.83                                           | 18.56                                          |
| $\beta$                             | 25.04    | -70.18        | 37.36                                           | -194.58                                        |
| $\gamma$                            | 67.27    | 119.20        | 15.09                                           | 717.87                                         |
